# Supplementary material for: Histone deacetylase inhibitors modulate hormesis in leukemic cells with mutant FMS-like tyrosine kinase-3
Source: PubMed Central journal article supplement (PMC10624624; doi:10.1038/s41375-023-02036-2), 2023-09-21
Supplement: 41375_2023_2036_MOESM3_ESM.pdf [file 41375_2023_2036_MOESM3_ESM.pdf]

yanira.zeyn@uni-mainz.de

AW: Matthias Bros added in revision - Nachricht (HTML)

Suchen

Datei Nachricht Hilfe

Löschen Archivieren Verschieben Antworten Allen antworten Weiterleiten Posteingang Als ungelesen markieren Suchen Zoom

AW: Matthias Bros added in revision

Zeyn, Yanira  
An Brenner, Prof. Dr. Walburgis; Beyer, Mandy  
Cc Krämer, Oliver; Hallilovic, Melisa; Bros, Dr. Matthias; Wolfgang Sippl; Siavosh Mahboobi; hany.ibrahim@pharmazie.uni-halle.de; kristin.hausmann@gmx.de

Do 07.09.2023 09:42

OK to me.

Yanira Zeyn  
Doktorandin

UNIVERSITÄTSMEDIZIN  
der Johannes Gutenberg-Universität Mainz  
Hautklinik AG Grabbe/Bros PKZI 308A  
Langenbeckstraße 1  
D - 55131 Mainz

Telefon: +49 (0) 6131 17-9758  
E-Mail: [yanira.zeyn@uni-mainz.de](mailto:yanira.zeyn@uni-mainz.de)

Von: Brenner, Prof. Dr. Walburgis  
Gesendet: Mittwoch, 6. September 2023 23:11:25  
An: Beyer, Mandy  
Cc: Krämer, Oliver; Zeyn, Yanira; Hallilovic, Melisa; Bros, Dr. Matthias; Wolfgang Sippl; Siavosh Mahboobi; [hany.ibrahim@pharmazie.uni-halle.de](mailto:hany.ibrahim@pharmazie.uni-halle.de); [kristin.hausmann@gmx.de](mailto:kristin.hausmann@gmx.de)  
Betreff: Re: Matthias Bros added in revision

I confirm my agreement.  
Walburgis Brenner

Am 06.09.2023 um 21:04 schrieb Beyer, Mandy <[manbeyer@uni-mainz.de](mailto:manbeyer@uni-mainz.de)>:

25°C  
Sonntag

kristin.hausmann@gmx.de

AW: Matthias Bros added in revision - Nachricht (HTML)

Suchen

Datei Nachricht Hilfe

Löschen Archivieren Verschieben Antworten Allen antworten Weiterleiten Posteingang Als ungelesen markieren Suchen Zoom

AW: Matthias Bros added in revision

Kristin Hausmann <[kristin.hausmann@gmx.de](mailto:kristin.hausmann@gmx.de)>  
An Krämer, Oliver

Do 07.09.2023 10:42

I confirm  
best regards  
Kristin Hausmann  
E-mail: [kristin.hausmann@gmx.de](mailto:kristin.hausmann@gmx.de)  
T +4916091770745  
[linkedin.com/in/kristin-hausmann-03a563262](https://www.linkedin.com/in/kristin-hausmann-03a563262)

Gesendet: Mittwoch, 06. September 2023 um 19:40 Uhr  
Von: "Krämer, Oliver" <[okraemer@uni-mainz.de](mailto:okraemer@uni-mainz.de)>  
An: "Zeyn, Yanira" <[yanira.zeyn@uni-mainz.de](mailto:yanira.zeyn@uni-mainz.de)>, "Hallilovic, Melisa" <[hallilovm@uni-mainz.de](mailto:hallilovm@uni-mainz.de)>, "Bros, Dr. Matthias" <[mbros@uni-mainz.de](mailto:mbros@uni-mainz.de)>, "Wolfgang Sippl" <[wolfgang.sippl@pharmazie.uni-halle.de](mailto:wolfgang.sippl@pharmazie.uni-halle.de)>, "Siavosh Mahboobi" <[siavosh.mahboobi@chemie.uni-regensburg.de](mailto:siavosh.mahboobi@chemie.uni-regensburg.de)>, "Brenner, Prof. Dr. Walburgis" <[brenner@uni-mainz.de](mailto:brenner@uni-mainz.de)>, "Beyer, Mandy" <[manbeyer@uni-mainz.de](mailto:manbeyer@uni-mainz.de)>, "hany.ibrahim@pharmazie.uni-halle.de" <[hany.ibrahim@pharmazie.uni-halle.de](mailto:hany.ibrahim@pharmazie.uni-halle.de)>, "kristin.hausmann@gmx.de" <[kristin.hausmann@gmx.de](mailto:kristin.hausmann@gmx.de)>  
Cc: "Krämer, Oliver" <[okraemer@uni-mainz.de](mailto:okraemer@uni-mainz.de)>  
Betreff: Matthias Bros added in revision

Dear All,

Please respond to this email until tomorrow 12 noon. Needed is a reply confirming that you approve of the change: Matthias Bros has been added

Histone deacetylase inhibitors modulate horesis in leukemic cells with mutant FMS-like tyrosine kinase-3

It has come to our attention that your current author list has changed since your initial submission: Matthias Bros has been added.  
To confirm your revised author list, we require agreement from all co-authors. To provide this agreement, please email all authors and ask them to reply confirming that they approve of the change. Please combine screenshots of all responses into a single PDF file, and upload this with your submission. Please name this file "Authorship Change Approval", and use the "Related Manuscript File" file type.

Best wishes!

25°C  
Sonntag

# Halilovic, Melisa [halilovm@uni-mainz.de](mailto:halilovm@uni-mainz.de)

Re: Matthias Bros added in revision - Nachricht (HTML)

Datei Nachricht Hilfe

Löschen Archivieren Verschieben Antworten Allen antworten Weiterleiten Posteingang Als ungelesen markieren Suchen Zoom

Re: Matthias Bros added in revision

 Halilovic, Melisa  
An Zeyn, Yanira; Brenner, Prof. Dr. Walburgis; Beyer, Mandy  
Cc Krämer, Oliver; Bros, Dr. Matthias; Wolfgang Sippl; Siavosh Mahboobi; hany.ibrahim@pharmazie.uni-halle.de; kristin.hausmann@gmx.de

Do 07.09.2023 12:17

OK to me.

Melisa Halilovic

From: Zeyn, Yanira  
Sent: Thursday, September 7, 2023 9:42:07 AM  
To: Brenner, Prof. Dr. Walburgis; Beyer, Mandy  
Cc: Krämer, Oliver; Halilovic, Melisa; Bros, Dr. Matthias; Wolfgang Sippl; Siavosh Mahboobi; hany.ibrahim@pharmazie.uni-halle.de; kristin.hausmann@gmx.de  
Subject: AW: Matthias Bros added in revision

OK to me.

Yanira Zeyn  
Doktorandin

UNIVERSITÄTSMEDIZIN  
der Johannes Gutenberg-Universität Mainz  
Hautklinik AG Grabbe/Bros PKZ1 308A  
Langenbeckstraße 1  
D - 55131 Mainz

Telefon: +49 (0) 6131 17-9758  
E-Mail: [yanira.zeyn@uni-mainz.de](mailto:yanira.zeyn@uni-mainz.de)

Von: Brenner, Prof. Dr. Walburgis  
Gesendet: Mittwoch, 6. September 2023 23:11:25  
An: Beyer, Mandy  
Cc: Krämer, Oliver; Zeyn, Yanira; Halilovic, Melisa; Bros, Dr. Matthias; Wolfgang Sippl; Siavosh Mahboobi; hany.ibrahim@pharmazie.uni-halle.de; kristin.hausmann@gmx.de

29°C Sonntag

# Mandy Beyer [manbeyer@uni-mainz.de](mailto:manbeyer@uni-mainz.de)

RE: Matthias Bros added in revision - Nachricht (HTML)

Datei Nachricht Hilfe

Löschen Archivieren Verschieben Antworten Allen antworten Weiterleiten Posteingang Als ungelesen markieren Suchen Zoom

RE: Matthias Bros added in revision

 Beyer, Mandy  
An Krämer, Oliver; Zeyn, Yanira; Halilovic, Melisa; Bros, Dr. Matthias; Wolfgang Sippl; Siavosh Mahboobi; Brenner, Prof. Dr. Walburgis; hany.ibrahim@pharmazie.uni-halle.de; kristin.hausmann@gmx.de

Mi 06.09.2023 21:05

OK to me  
Mandy Beyer

----- Ursprüngliche Nachricht -----  
Von: "Krämer, Oliver" <[okraemer@uni-mainz.de](mailto:okraemer@uni-mainz.de)>  
Datum: 06.09.23 19:40 (GMT+01:00)  
An: "Zeyn, Yanira" <[yanira.zeyn@uni-mainz.de](mailto:yanira.zeyn@uni-mainz.de)>, "Halilovic, Melisa" <[halilovm@uni-mainz.de](mailto:halilovm@uni-mainz.de)>, "Bros, Dr. Matthias" <[mbros@uni-mainz.de](mailto:mbros@uni-mainz.de)>, Wolfgang Sippl <[wolfgang.sippl@pharmazie.uni-halle.de](mailto:wolfgang.sippl@pharmazie.uni-halle.de)>, Siavosh Mahboobi <[Siavosh.Mahboobi@chemie.uni-erlangen.de](mailto:Siavosh.Mahboobi@chemie.uni-erlangen.de)>, "Brenner, Prof. Dr. Walburgis" <[wbrenner@uni-mainz.de](mailto:wbrenner@uni-mainz.de)>, "Beyer, Mandy" <[manbeyer@uni-mainz.de](mailto:manbeyer@uni-mainz.de)>, hany.ibrahim@pharmazie.uni-halle.de, kristin.hausmann@gmx.de  
Cc: "Krämer, Oliver" <[okraemer@uni-mainz.de](mailto:okraemer@uni-mainz.de)>  
Betreff: Matthias Bros added in revision

Dear All,

Please respond to this email until tomorrow 12 noon. Needed is a reply confirming that you approve of the change: Matthias Bros has been added

Histone deacetylase inhibitors modulate hormesis in leukemic cells with mutant FMS-like tyrosine kinase-3

It has come to our attention that your current author list has changed since your initial submission: Matthias Bros has been added.  
To confirm your revised author list, we require agreement from all co-authors. To provide this agreement, please email all authors and ask them to reply confirming that they approve of the change. Please combine screenshots of all responses into a single PDF file, and upload this with your submission. Please name this file 'Authorship Change Approval', and use the 'Related Manuscript File' file type.

Best wishes!

22°C Stark bewölkt

[hany.ibrahim@pharmazie.uni-halle.de](mailto:hany.ibrahim@pharmazie.uni-halle.de)

Re: Matthias Bros added in revision

Hany Ibrahim <hany.ibrahim@pharmazie.uni-halle.de>  
An: Siavosh.Mahboobi@chemie.uni-regensburg.de; kristin.hausmann@gmx.de; Wolfgang Sippl; Brenner, Prof. Dr. Walburgis; Halliovic, Melisa; Beyer, Mandy; Bros, Dr. Matthias; Krämer, Oliver; Zeyn, Yanira  
Mi 06.09.2023 19:51

Ok to me

Hany Ibrahim

>>> On 09/06/2023 at 07:40 PM, Krämer, Oliver <okraemer@uni-mainz.de> <okraemer@uni-mainz.de> wrote:  
Dear All,

Please respond to this email until tomorrow 12 noon. Needed is a reply confirming that you approve of the change: Matthias Bros has been added

Histone deacetylase inhibitors modulate hormesis in leukemic cells with mutant FMS-like tyrosine kinase-3

It has come to our attention that your current author list has changed since your initial submission: Matthias Bros has been added.  
To confirm your revised author list, we require agreement from all co-authors. To provide this agreement, please email all authors and ask them to reply confirming that they approve of the change. Please combine screenshots of all responses into a single PDF file, and upload this with your submission. Please name this file 'Authorship Change Approval', and use the 'Related Manuscript File' file type.

Best wishes!

Brenner, Prof. Dr. Walburgis [brenner@uni-mainz.de](mailto:brenner@uni-mainz.de)

Re: Matthias Bros added in revision

Brenner, Prof. Dr. Walburgis  
An: Beyer, Mandy  
Cc: Krämer, Oliver; Zeyn, Yanira; Halliovic, Melisa; Bros, Dr. Matthias; Wolfgang Sippl; Siavosh Mahboobi; hany.ibrahim@pharmazie.uni-halle.de; kristin.hausmann@gmx.de  
Mi 06.09.2023 23:11

I confirm my agreement.  
Walburgis Brenner

Am 06.09.2023 um 21:04 schrieb Beyer, Mandy <manbeyer@uni-mainz.de>:

OK to me  
Mandy Beyer

----- Ursprüngliche Nachricht -----  
Von: "Krämer, Oliver" <okraemer@uni-mainz.de>  
Datum: 06.09.23 19:40 (GMT+01:00)  
An: "Zeyn, Yanira" <yanira.zeyn@uni-mainz.de>, "Halliovic, Melisa" <halliovic@uni-mainz.de>, "Bros, Dr. Matthias" <mbros@uni-mainz.de>, Wolfgang Sippl <wolfgang.sippl@pharmazie.uni-halle.de>, Siavosh Mahboobi <Siavosh.Mahboobi@chemie.uni-regensburg.de>, "Brenner, Prof. Dr. Walburgis" <brenner@uni-mainz.de>, "Beyer, Mandy" <manbeyer@uni-mainz.de>, hany.ibrahim@pharmazie.uni-halle.de, kristin.hausmann@gmx.de  
Cc: "Krämer, Oliver" <okraemer@uni-mainz.de>  
Betreff: Matthias Bros added in revision

Dear All,

Please respond to this email until tomorrow 12 noon. Needed is a reply confirming that you approve of the change: Matthias Bros has been added

Histone deacetylase inhibitors modulate hormesis in leukemic cells with mutant FMS-like tyrosine kinase-3

It has come to our attention that your current author list has changed since your initial submission: Matthias Bros has been added.  
To confirm your revised author list, we require agreement from all co-authors. To provide this agreement, please email all authors and ask them to reply confirming that they approve of the change. Please combine screenshots of all responses into a single PDF file, and upload this with your submission. Please name this file 'Authorship Change Approval', and use the 'Related Manuscript File' file type.

Siavosh Mahboobi [Siavosh.Mahboobi@chemie.uni-regensburg.de](mailto:Siavosh.Mahboobi@chemie.uni-regensburg.de)

Antw: [EXT] Matthias Bros added in revision

SM Siavosh Mahboobi <Siavosh.Mahboobi@chemie.uni-regensburg.de>  
An kristin.hausmann@gmx.de; hany.ibrahim@pharmazie.uni-halle.de; wolfgang.sippl@pharmazie.uni-halle.de; Brenner, Prof. Dr. Walburgis; Hallilovic, Melisa; Beyer, Mandy; Bros, Dr. Matthias; Krämer, Oliver; Zeyn, Yanira  
Mi 06.09.2023 20:21

OK to me  
Siavosh Mahboobi

>>> Krämer, Oliver <okraemer@uni-mainz.de> 06.09.2023 19:40 >>>  
Dear All,

Please respond to this email until tomorrow 12 noon. Needed is a reply confirming that you approve of the change: Matthias Bros has been added

Histone deacetylase inhibitors modulate hormesis in leukemic cells with mutant FMS-like tyrosine kinase-3

It has come to our attention that your current author list has changed since your initial submission: Matthias Bros has been added. To confirm your revised author list, we require agreement from all co-authors. To provide this agreement, please email all authors and ask them to reply confirming that they approve of the change. Please combine screenshots of all responses into a single PDF file, and upload this with your submission. Please name this file 'Authorship Change Approval', and use the 'Related Manuscript File' file type.

Best wishes!

Bros, Dr. Matthias [mbros@uni-mainz.de](mailto:mbros@uni-mainz.de)

AW: Matthias Bros added in revision

BD Bros, Dr. Matthias  
An Krämer, Oliver  
Mi 06.09.2023 19:49

I agree.

Best,  
Matthias Bros

University Medical Center Mainz  
Dept. of Dermatology  
Lab Grabbe/Bros, Bldg. 308a (FKZI)  
PO Dr. rer. nat. et med. habil. Matthias Bros  
Langenbeckstr. 1  
Fon: +49613179846  
D-55131 Germany

Von: Krämer, Oliver  
Gesendet: Mittwoch, 6. September 2023 19:40:51  
An: Zeyn, Yanira; Hallilovic, Melisa; Bros, Dr. Matthias; Wolfgang Sippl; Siavosh Mahboobi; Brenner, Prof. Dr. Walburgis; Beyer, Mandy; hany.ibrahim@pharmazie.uni-halle.de; kristin.hausmann@gmx.de  
Cc: Krämer, Oliver  
Betreff: Matthias Bros added in revision

Dear All,

Please respond to this email until tomorrow 12 noon. Needed is a reply confirming that you approve of the change: Matthias Bros has been added

Histone deacetylase inhibitors modulate hormesis in leukemic cells with mutant FMS-like tyrosine kinase-3

It has come to our attention that your current author list has changed since your initial submission: Matthias Bros has been added. To confirm your revised author list, we require agreement from all co-authors. To provide this agreement, please email all authors and ask them to reply confirming that they approve of the change. Please combine screenshots of all responses into a single PDF file, and upload this with your submission. Please name this file 'Authorship Change Approval', and use the 'Related Manuscript File' file type.

wolfgang.sippl@pharmazie.uni-halle.de

Re: Matthias Bros added in revision - Nachricht (HTML)

WS Wolfgang Sippl <wolfgang.sippl@pharmazie.uni-halle.de>  
An: Krämer, Oliver  
Cc: Zeyn, Yanira; Hallilovic, Melisa; Bros, Dr. Matthias; Siavosh Mahboobi; Brenner, Prof. Dr. Walburgis; Beyer, Mandy; Hany Ibrahim; Kristin Hausmann

Altinselemente

OK to me  
Wolfgang Sippl

TypeApp for Android herunterladen

Am 6. Sept. 2023, um 19:40, "Krämer, Oliver" <okraemer@uni-mainz.de> schrieb:

Dear All,

Please respond to this email until tomorrow 12 noon. Needed is a reply confirming that you approve of the change: Matthias Bros has been added

Histone deacetylase inhibitors modulate hormesis in leukemic cells with mutant FMS-like tyrosine kinase-3

It has come to our attention that your current author list has changed since your initial submission: Matthias Bros has been added. To confirm your revised author list, we require agreement from all co-authors. To provide this agreement, please email all authors and ask them to reply confirming that they approve of the change. Please combine screenshots of all responses into a single PDF file, and upload this with your submission. Please name this file 'Authorship Change Approval', and use the 'Related Manuscript File' file type.

Best wishes!

22°C Stark bewölkt 06.09.2023 21:25

Oliver Krämer (last and corresponding author):

AW: Matthias Bros added in revision - Nachricht (Nur-Text)

KO Krämer, Oliver  
An: Krämer, Oliver

I am more than happy that Matthias Bros has been included.

Best regards,  
Oliver Krämer

-----Ursprüngliche Nachricht-----  
Von: Krämer, Oliver <okraemer@uni-mainz.de>  
Gesendet: Mittwoch, 6. September 2023 19:41  
An: Zeyn, Yanira <yanira.zeyn@uni-mainz.de>; Hallilovic, Melisa <hallilovm@uni-mainz.de>; Bros, Dr. Matthias <mbros@uni-mainz.de>; Wolfgang Sippl <wolfgang.sippl@pharmazie.uni-halle.de>; Siavosh Mahboobi <Siavosh.Mahboobi@chemie.uni-regensburg.de>; Brenner, Prof. Dr. Walburgis <brenner@uni-mainz.de>; Beyer, Mandy <manbeyer@uni-mainz.de>; hany.ibrahim@pharmazie.uni-halle.de; kristin.hausmann@gmx.de  
Cc: Krämer, Oliver <okraemer@uni-mainz.de>  
Betreff: Matthias Bros added in revision

Dear All,

Please respond to this email until tomorrow 12 noon. Needed is a reply confirming that you approve of the change: Matthias Bros has been added

Histone deacetylase inhibitors modulate hormesis in leukemic cells with mutant FMS-like tyrosine kinase-3

It has come to our attention that your current author list has changed since your initial submission: Matthias Bros has been added. To confirm your revised author list, we require agreement from all co-authors. To provide this agreement, please email all authors and ask them to reply confirming that they approve of the change. Please combine screenshots of all responses into a single PDF file, and upload this with your submission. Please name this file 'Authorship Change Approval', and use the 'Related Manuscript File' file type.

Best wishes!

29°C Sonnig 07.09.2023 17:15
